# Supplementary material for: Pivotal Study Evaluating the Safety and Effectiveness of the Abre Venous Self-Expanding Stent System in Patients With Symptomatic Iliofemoral Venous Outflow Obstruction
Source: PubMed Central journal article supplement — Circ Cardiovasc Interv. 2022 Feb 2;15(2):e010960. doi: 10.1161/CIRCINTERVENTIONS.121.010960 (PMC8843393; doi:10.1161/circinterventions.121.010960), 2022-02-02
Supplement: hcv-15-e010960-s001.pdf [file hcv-15-e010960-s001.pdf]

# ABRE STUDY

SINGLE-ARM, MULTICENTER,  
PROSPECTIVE STUDY

Precision. Strength. Flexibility. Integrity.

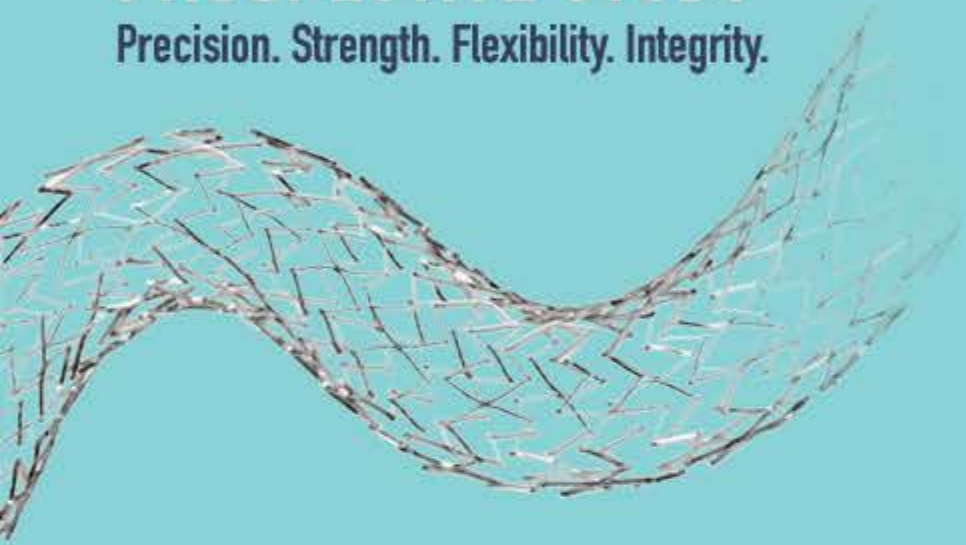

200 SUBJECTS  
FROM 24 GLOBAL SITES

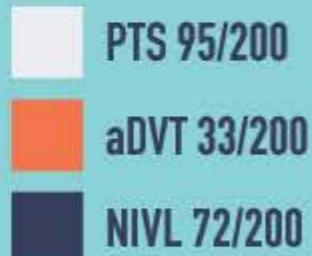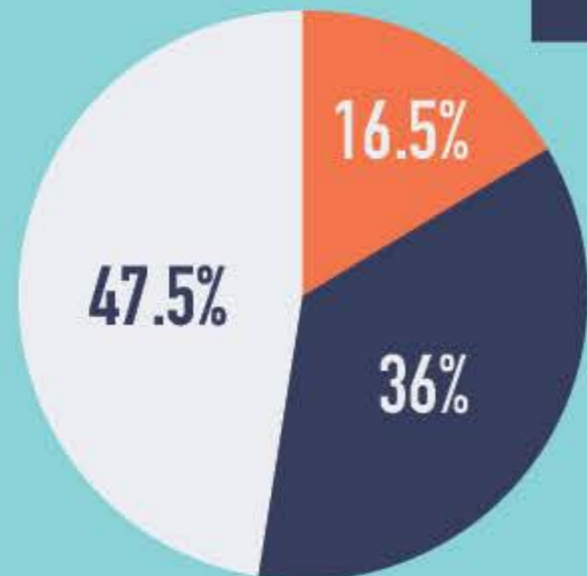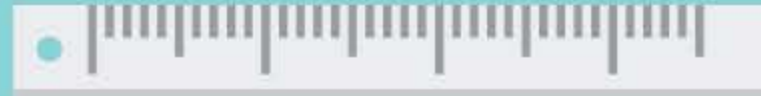

TOTAL STENTED LENGTH (MM)  
(Mean  $\pm$  SD): 121.5 (45, 283)

ABRE VENOUS SELF-EXPANDING STENT SYSTEM WAS PROVEN

SAFE AND EFFECTIVE

PRIMARY ENDPOINT  
(AT 12 MONTHS): 88%<sup>1</sup>

|      |       |
|------|-------|
| aDVT | 87.1% |
| NIVL | 98.6% |
| PTS  | 79.8% |

MAJOR ADVERSE EVENTS  
(THROUGH 30 DAYS): 2%<sup>2</sup>

1 PRIMARY ASSISTED PATENCY  
(AT 12 MONTHS): 91.8%<sup>3</sup>

2 SECONDARY PATENCY  
(AT 12 MONTHS): 92.9%<sup>4</sup>

100% DEVICE SUCCESS

## NO STENT FRACTURES

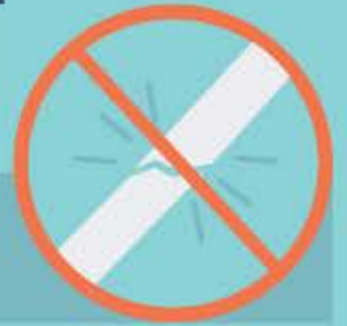

## CHALLENGING POPULATION TREATED IN THE ABRE STUDY:

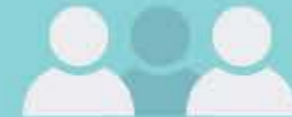

Stents in 88 SUBJECTS (44%)  
extended below the inguinal ligament.

All groups demonstrated sustained and clinically meaningful improvements in QoL measures and venous functional assessment scores at 12 months compared to baseline.

<sup>1</sup> (162/184) Primary patency defined as freedom from occlusion of the stented segment of the target lesion, restenosis  $\geq$  50% of the stented segment of the target lesion, and clinically-driven target lesion revascularization.

<sup>2</sup> (4/200) Major adverse events (MAEs) include all-cause death occurring post-procedure, clinically significant pulmonary embolism, procedural major bleeding, stent thrombosis confirmed by imaging as assessed by core lab, and stent migration confirmed by imaging as assessed by core lab.

<sup>3</sup> (169/184) Primary assisted patency: uninterrupted patency of the stented segment of the target lesion with a secondary intervention, also known as an adjunctive treatment (e.g., balloon venoplasty, subsequent stenting).

<sup>4</sup> (171/184) Secondary patency: patency of the stented segment of the target lesion after subsequent intervention for an occlusion.
